## Correction

**Correction: Circulating microRNA signature as liquid-biopsy to monitor lung cancer in low-dose computed tomography screening****Stefano Sestini<sup>1,\*</sup>, Mattia Boeri<sup>2,\*</sup>, Alfonso Marchiano<sup>3</sup>, Giuseppe Pelosi<sup>4,5</sup>, Carlotta Galeone<sup>6</sup>, Carla Verri<sup>2</sup>, Paola Suatoni<sup>1</sup>, Nicola Sverzellati<sup>7</sup>, Carlo La Vecchia<sup>8,\*</sup>, Gabriella Sozzi<sup>2,\*</sup>, Ugo Pastorino<sup>1,\*</sup>**<sup>1</sup>Unit of Thoracic Surgery, Fondazione IRCCS Istituto Nazionale Tumori, Milan, Italy<sup>2</sup>Unit of Tumor Genomics, Department of Experimental Oncology, Fondazione IRCCS Istituto Nazionale Tumori, Milan, Italy<sup>3</sup>Unit of Radiology, Fondazione IRCCS Istituto Nazionale Tumori, Milan, Italy<sup>4</sup>Department of Pathology and Laboratory Medicine, Fondazione IRCCS Istituto Nazionale Tumori, Milan, Italy<sup>5</sup>Department of Clinical and Biomedical Sciences Luigi Sacco, University of Milan, Milan, Italy<sup>6</sup>Department of Statistics and Quantitative Methods, Division of Biostatistics, Epidemiology and Public Health, Laboratory of Healthcare Research and Pharmacoepidemiology, University of Milano-Bicocca, Milan, Italy<sup>7</sup>Department of Clinical Sciences, Section of Radiology, University of Parma, Milan, Italy<sup>8</sup>Department of Clinical Sciences and Community Health, University of Milan, Milan, Italy

\*These authors have contributed equally to this work

**Published:** October 15, 2019**Copyright:** Sestini et al. This is an open-access article distributed under the terms of the Creative Commons Attribution License 3.0 (CC BY 3.0), which permits unrestricted use, distribution, and reproduction in any medium, provided the original author and source are credited.**This article has been corrected:** In the Introduction section, the second sentence of the second paragraph was worded incorrectly. The proper sentence is as follows:

A significant reduction in lung cancer mortality was reported among the subjects enrolled in the LDCT arm of the National Lung Screening Trial (NLST) when compared to the chest X-ray arm, along with a false discovery rate of 96.4% and an overdiagnosis global rate of 18.5%, reaching 78.9% for indolent cancers in the LDCT arm.

Original article: Oncotarget. 2015; 6:32868–32877. <https://doi.org/10.18632/oncotarget.5210>
